# Supplementary material for: High selectivity and sensitivity fluorescence sensing of melamine based on the combination of a fluorescent chemosensor and molecularly imprinted polymers
Source: Royal Society of Chemistry journal article supplement (doi:10.1039/c5ra18316b), 2015-01-01
Supplement: c5ra18316b1.pdf [file c5ra18316b1.pdf]

## *Electronic Supporting Information for*

### **High selectivity and sensitivity fluorescent sensing melamine based on the combination of fluorescent chemosensor with molecularly imprinted polymers**

Kejin Sun<sup>a</sup>, Qiliang Deng<sup>a, \*</sup>, Ting Guo, Rina Su, Yuchen Gu, Shuo Wang\*

Key Laboratory of Food Nutrition and Safety, Ministry of Education, Tianjin Key

Laboratory of Food Nutrition and Safety, College of Chemical Engineering and

Materials Science, Tianjin University of Science and Technology, Tianjin 300457,

China

<sup>a</sup>These authors contributed equally to this work

---

\* Corresponding author Shuo Wang, Tel: (+86 22) 60912493 Fax: (+86 22)

60912489

E-mail: S.wang@tust.edu.cn; yhdql@tust.edu.cn

<sup>a</sup>Equally contributed to this work.

The adsorption capacity  $Q$  ( $\mu\text{mol/g}$ ) was calculated according to the following formula:

$$Q = \frac{(C_0 - C_e)V}{m} \quad (1)$$

Where,  $C_0$  (mmol/L) and  $C_e$  (mmol/L) were the initial and final concentrations, respectively,  $V$  (mL) was the total volume of the solution,  $m$  (mg) was the mass of MIPs or NIPs, and  $Q$  ( $\mu\text{mol/g}$ ) was the mass of target adsorbed through per gram of polymer.

The Scatchard analysis was calculated according to the following formula:

$$\frac{Q}{C_e} = \frac{Q_{\max} - Q_e}{K_d} = -\frac{1}{K_d} Q_e + \frac{Q_{\max}}{K_d} \quad (2)$$

Where  $Q$  and  $Q_{\max}$  ( $\mu\text{mol/g}$ ) were equilibrium and maximum adsorption capacities respectively,  $C_e$  (mmol/L) was the free concentration of analyte in solution, and  $K_d$  was the dissociation constant.

**Figure S1.**  $^1\text{H}$  NMR,  $^{13}\text{C}$  NMR and LC-MS spectroscopy of RBH.

**RBH:**  $^1\text{H}$  NMR (400 MHz,  $\text{CDCl}_3\text{-D}_1$ )  $\delta$  (ppm): 7.925-7.946 (1H, m, Ar-H), 7.438-7.458 (2H, m, Ar-H), 7.095-7.116 (1H, m, Ar-H), 6.417-6.471 (4H, m, Xanthene-H), 6.278-6.306 (2H, m, Xanthene-H), 3.613 (2H, s,  $\text{NH}_2$ ), 3.314-3.367 (8H, m,  $\text{NCH}_2\text{CH}_3$ ), 1.149-1.184 (12H, t,  $\text{NCH}_2\text{CH}_3$ ).  $^{13}\text{C}$  NMR (400 MHz,  $\text{CDCl}_3\text{-D}_1$ )  $\delta$  (ppm): 166.17, 153.86, 151.57, 148.91, 132.52, 130.03, 128.13, 128.09, 123.84, 122.99, 108.07, 104.58, 98.01, 65.95, 44.38, 12.61. LC-MS  $[\text{M}+\text{H}]^+$   $m/z$   $\text{C}_{28}\text{H}_{32}\text{N}_4\text{O}_2$  calcd. 456.58, found  $[\text{M}+\text{H}^+]$  457.41.

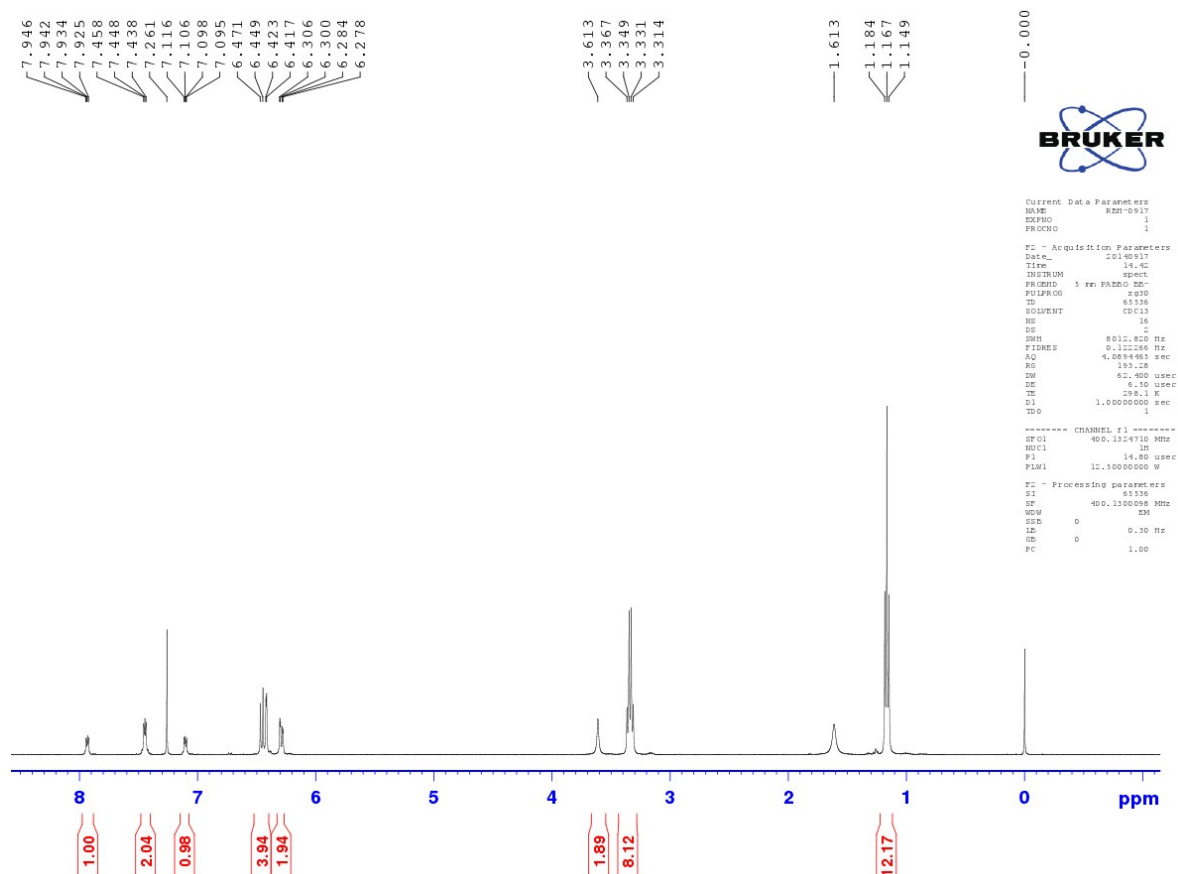

$^1\text{H}$  NMR spectroscopy of RBH.

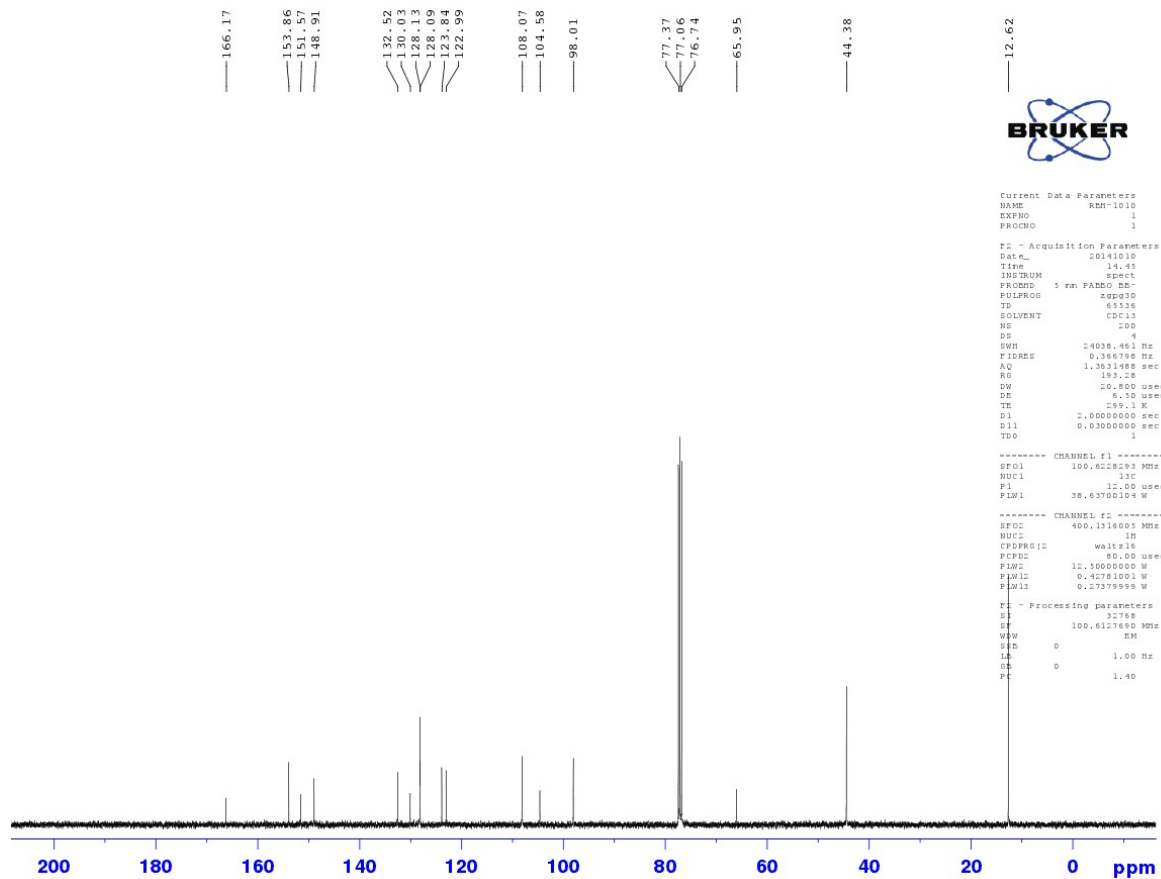

$^{13}\text{C}$  NMR spectroscopy of RBH.

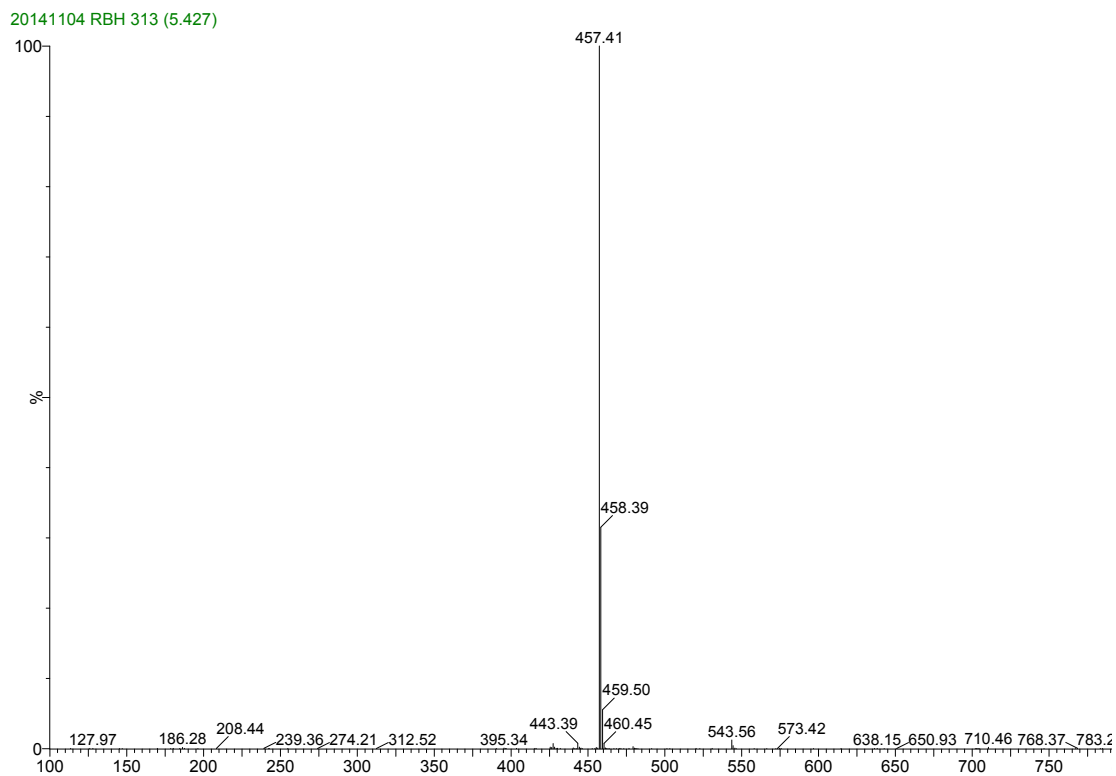

LC-MS spectrometry of RBH

**Figure S2.** <sup>1</sup>H NMR, <sup>13</sup>C NMR and LC-MS spectroscopy of RB1.

**RB1:** <sup>1</sup>H NMR (400 MHz, CDCl<sub>3</sub>-D<sub>1</sub>) δ (ppm): 9.430-9.449 (1H, s, -CHO), 8.028-8.047 (1H, m, N=C-H), 7.875-7.988 (1H, t, Ar-H), 7.419-7.564 (1H, m, Ar-H), 7.341-7.398 (1H, m, Ar-H), 7.022-7.103 (1H, m, Ar-H), 6.426-6.462 (2H, m, Xanthene-H), 6.396-6.402 (2H, d, Xanthene-H), 6.232-6.261 (1H, m, Xanthene-H), 6.144-6.172 (1H, m, Xanthene-H), 3.325-3.337 (8H, m, NCH<sub>2</sub>CH<sub>3</sub>), 1.170-1.206 (12H, t, NCH<sub>2</sub>CH<sub>3</sub>). <sup>13</sup>C NMR (100 MHz, CDCl<sub>3</sub>-D<sub>1</sub>) δ (ppm): 192.67, 166.00, 152.98, 152.63, 149.29, 141.20, 134.99, 128.63, 127.52, 126.55, 124.08, 108.22, 103.76, 98.12, 66.06, 44.35, 12.59. LC-MS [M+H]<sup>+</sup> *m/z* C<sub>30</sub>H<sub>32</sub>N<sub>4</sub>O<sub>3</sub> calcd. 496.60, found [M+H]<sup>+</sup> 497.42.

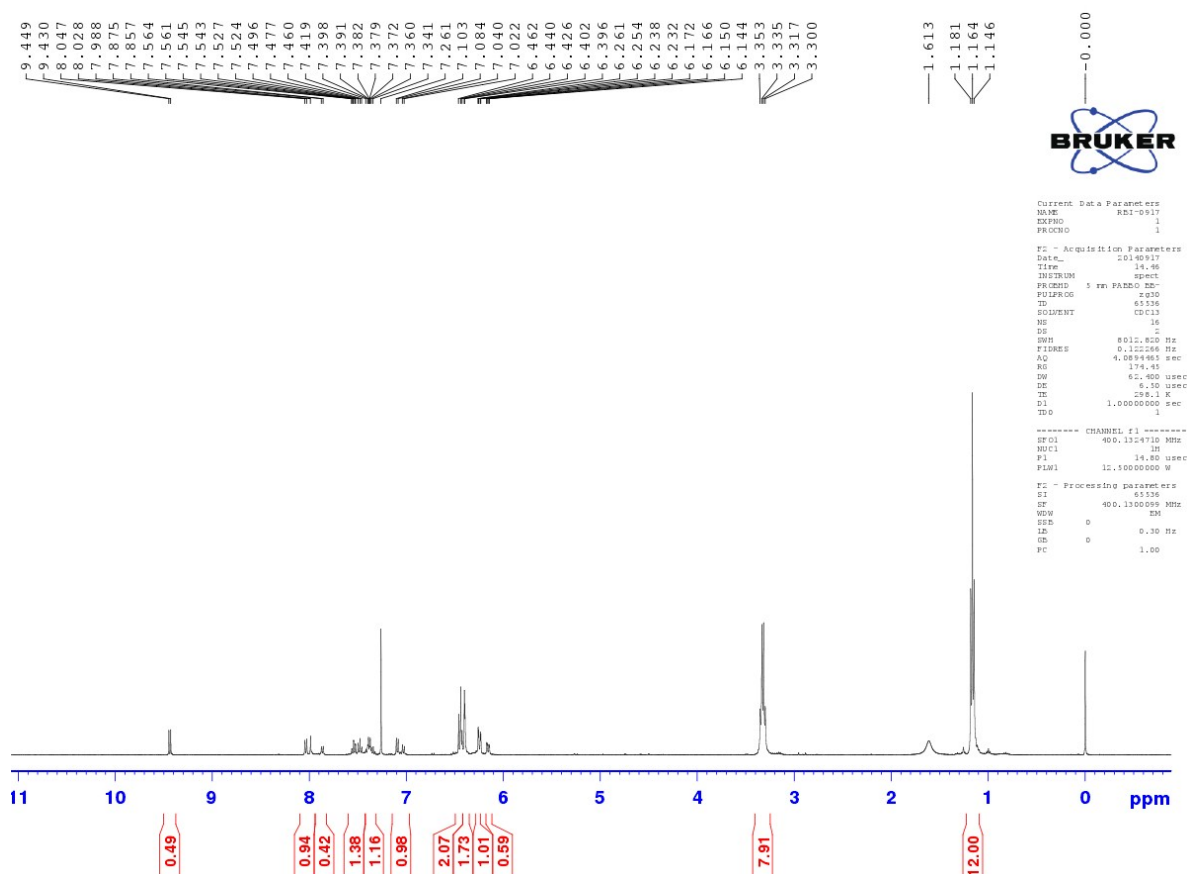

<sup>1</sup>H NMR spectroscopy of RB1.

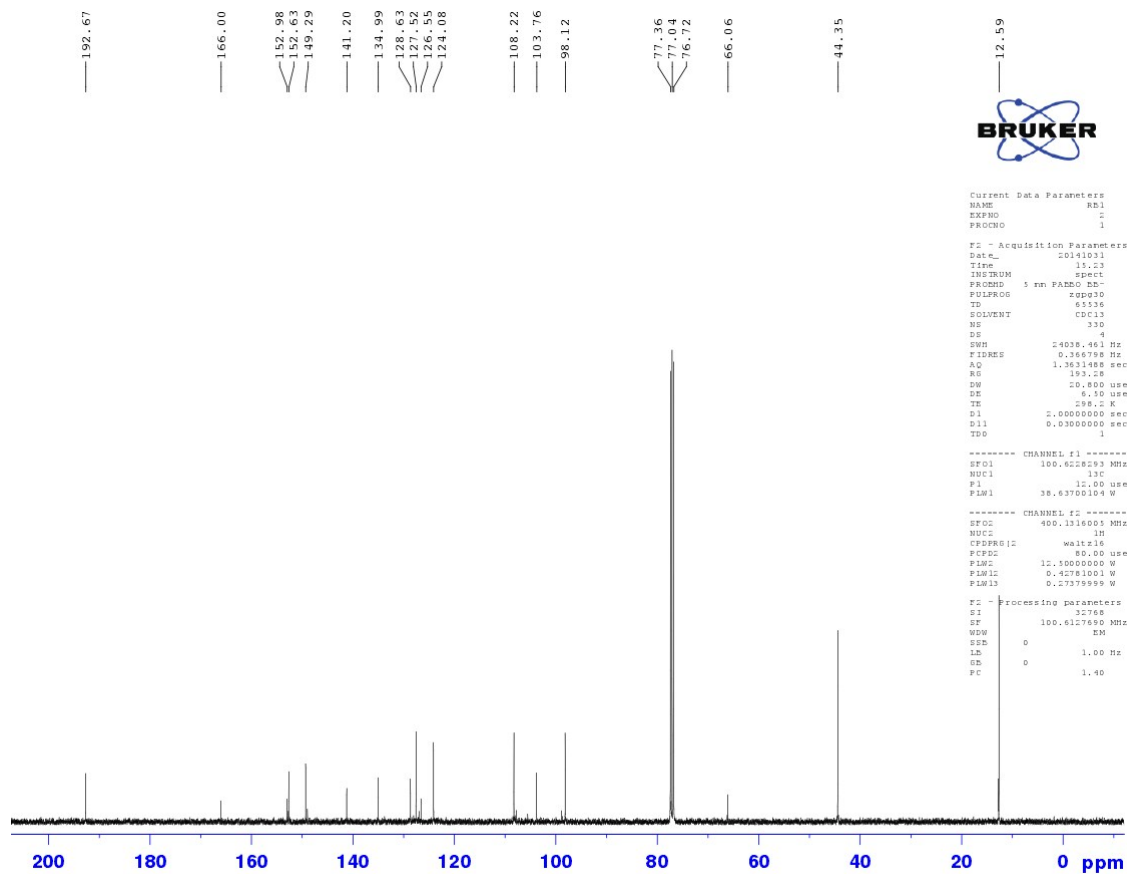

$^{13}\text{C}$  NMR spectroscopy of RB1.

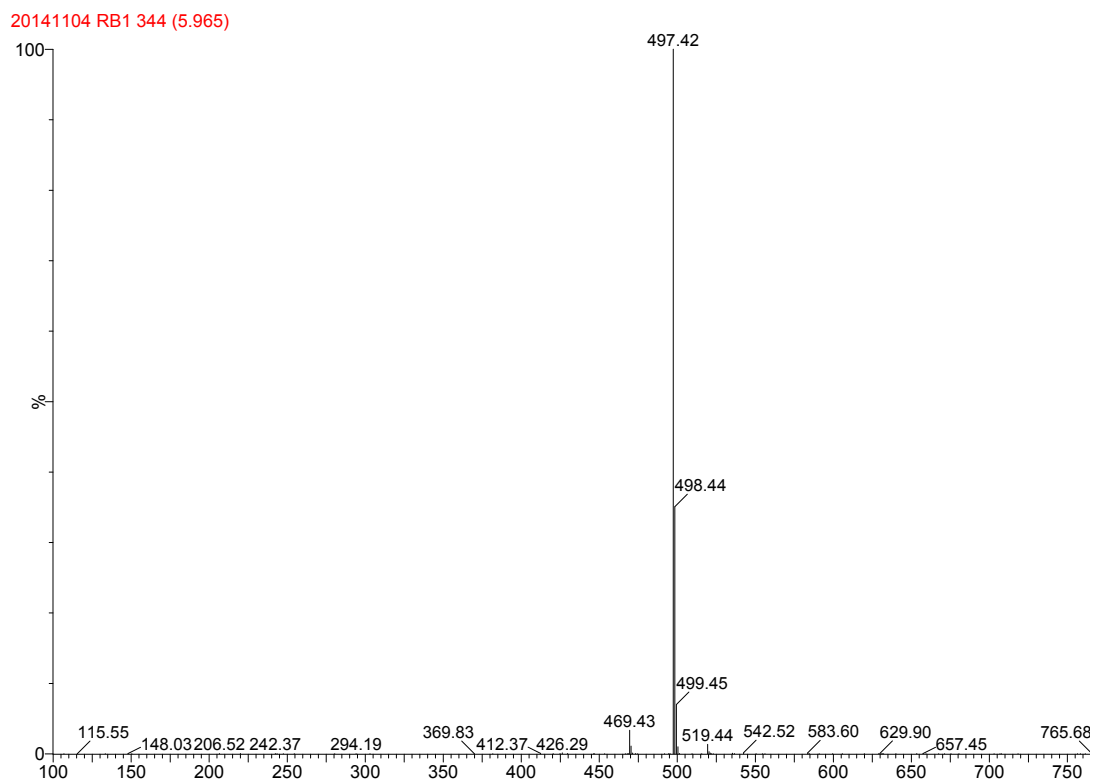

LC-MS spectrometry of RB1
